# Supplementary material for: Pd(ii)-catalyzed direct C–H acylation of N-Boc hydrazones with aldehydes: one-pot synthesis of 1,2-diacylbenzenes
Source: Royal Society of Chemistry journal article supplement (doi:10.1039/c3ob41644e), 2013-01-01

## Supporting Information

### **Pd(II)-catalyzed direct C–H acylation of *N*-Boc hydrazones with aldehydes: one-pot synthesis of 1,2-diacylbenzenes**

**Satyasheel Sharma,<sup>a</sup> Aejin Kim,<sup>a</sup> Jihye Park,<sup>a</sup> Mirim Kim,<sup>a</sup> Jong Hwan Kwak,<sup>a</sup> Young  
Hoon Jung,<sup>a</sup> Jung Su Park,<sup>b,\*</sup> and In Su Kim<sup>a,\*</sup>**

<sup>a</sup> *School of Pharmacy, Sungkyunkwan University, Suwon 440-746, Republic of Korea*

<sup>b</sup> *Department of Chemistry, Sookmyung Women's University, Seoul 140-742, Republic of Korea*

\* Corresponding authors. Tel.: +82-31-290-7788; Fax: +82-31-292-8800; E-mail: insukim@skku.edu (I.S.Kim). Tel.: +82-2-2077-7549; Fax: +82-2-2077-7321; E-mail: jspark@sookmyung.ac.kr (J.S.Park).

### **List of the Contents**

**<sup>1</sup>H NMR and <sup>13</sup>C NMR copies of all products (3a–l, 4b–n) -----S1–S27**

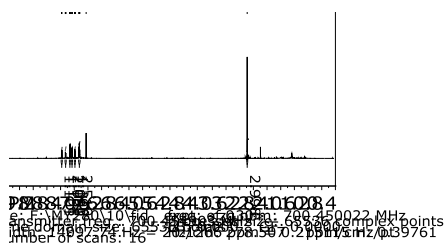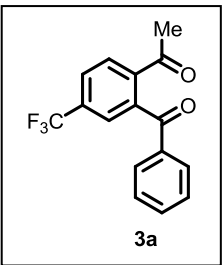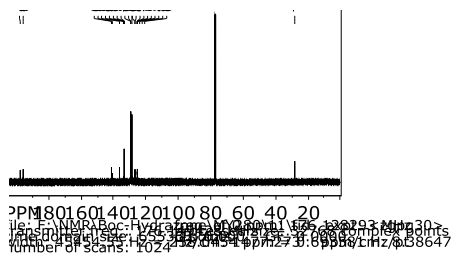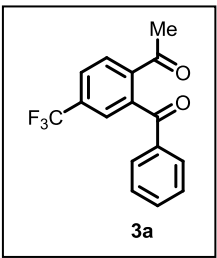

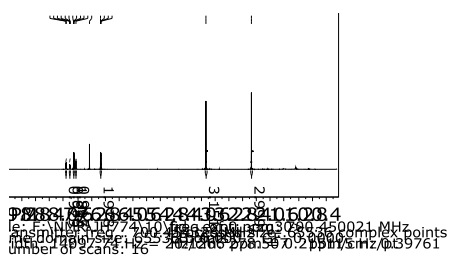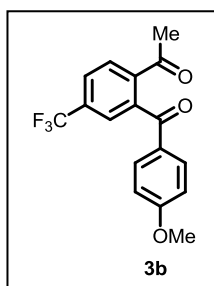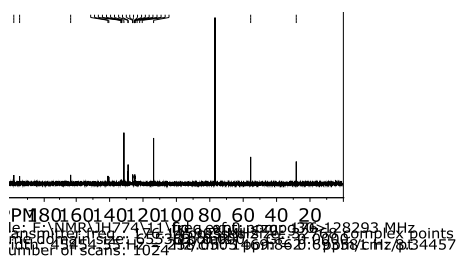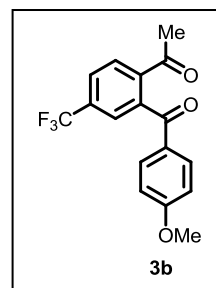

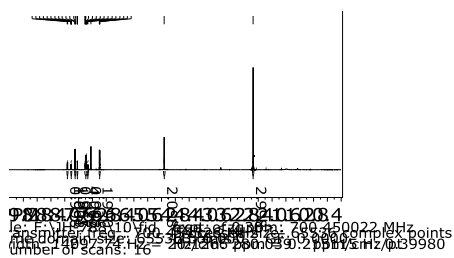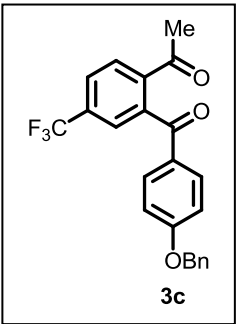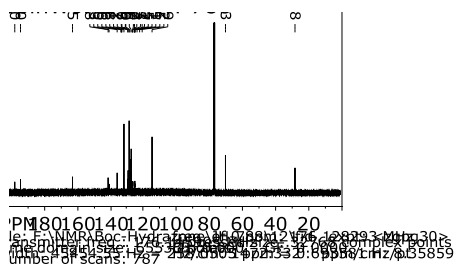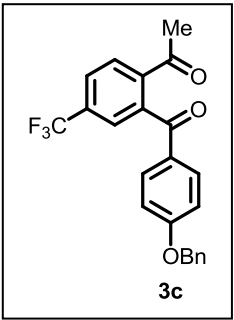

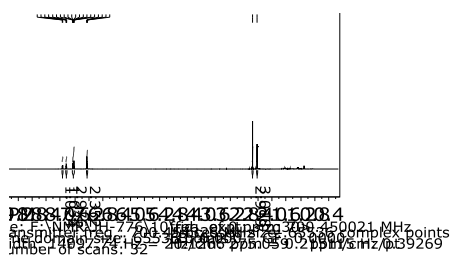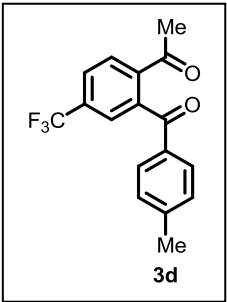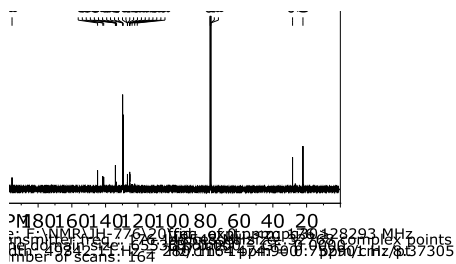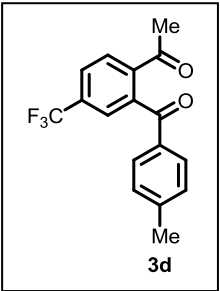

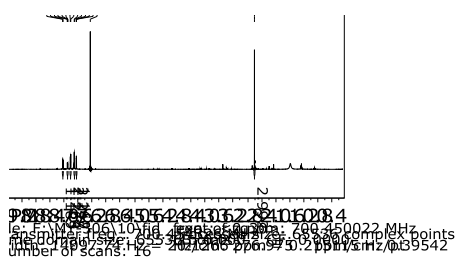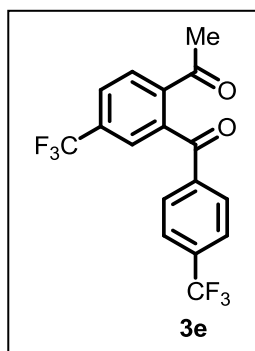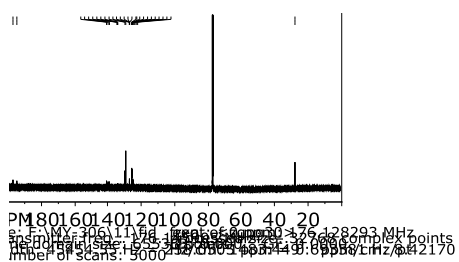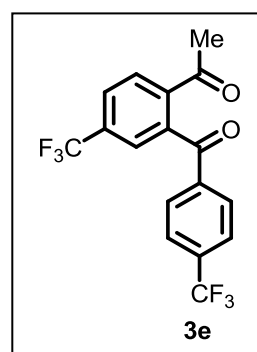

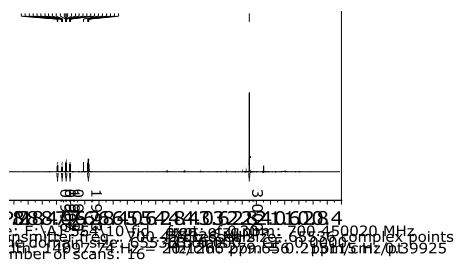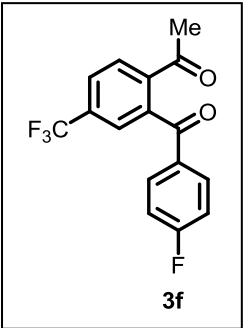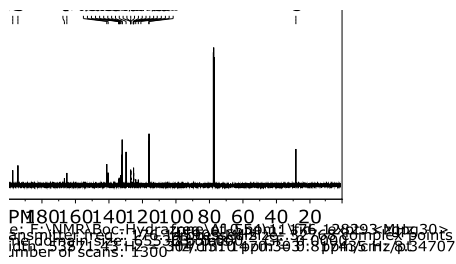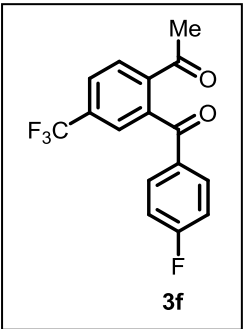

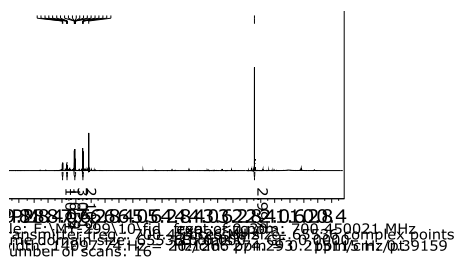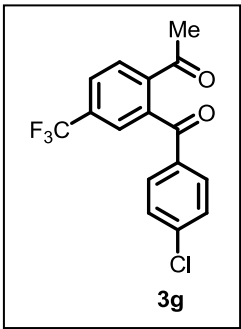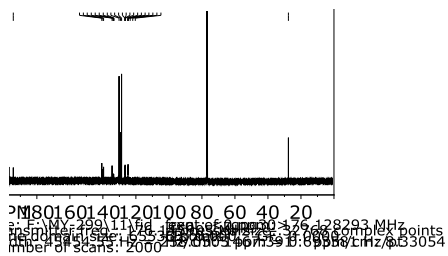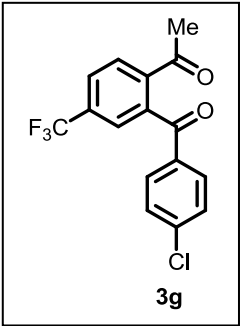



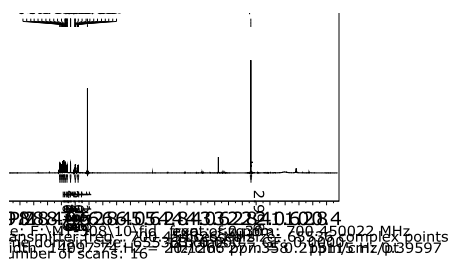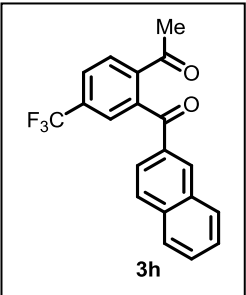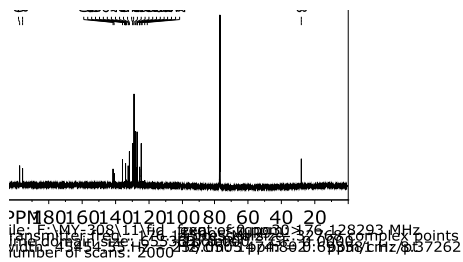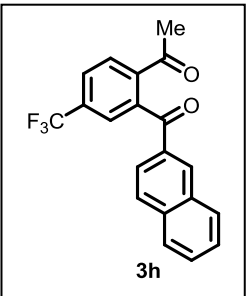

SpinWorks 3: MY-307

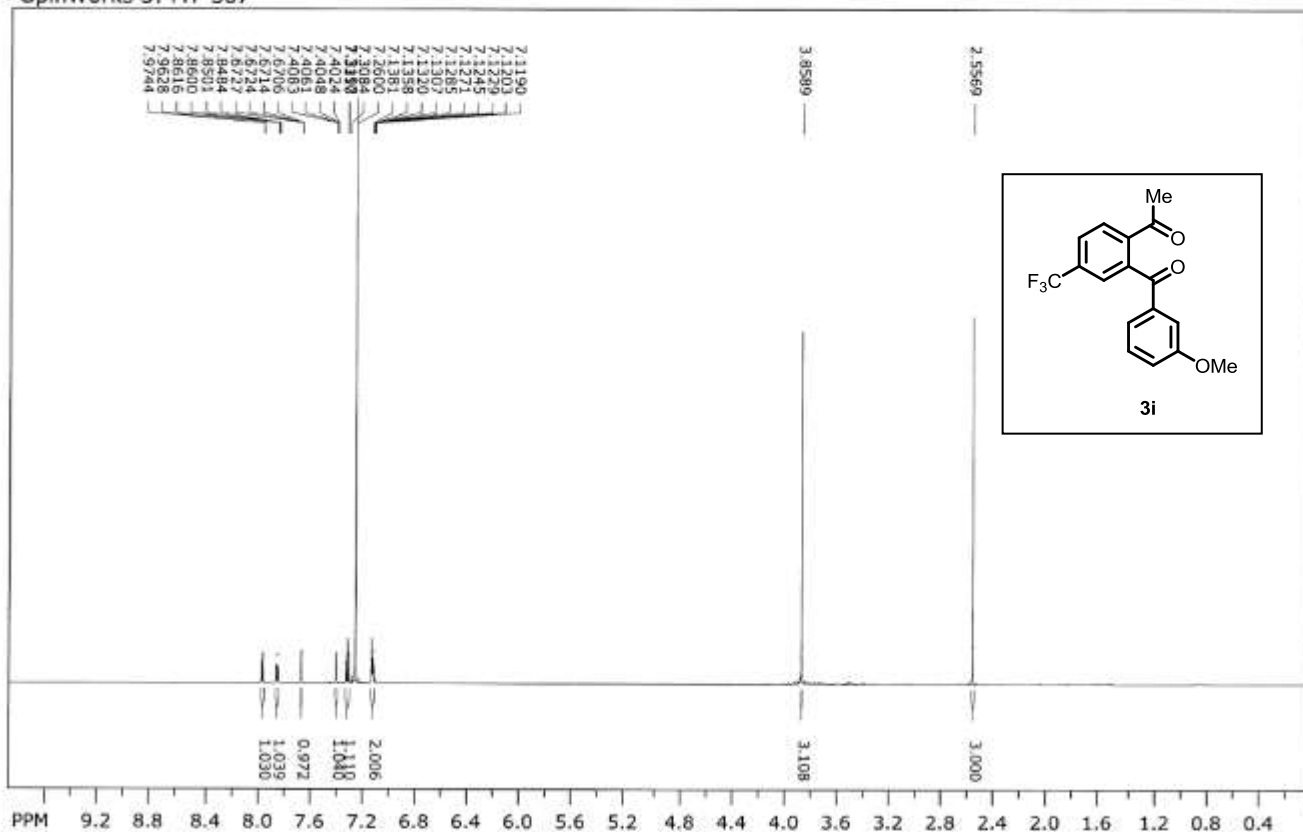

SpinWorks 3: MY-307

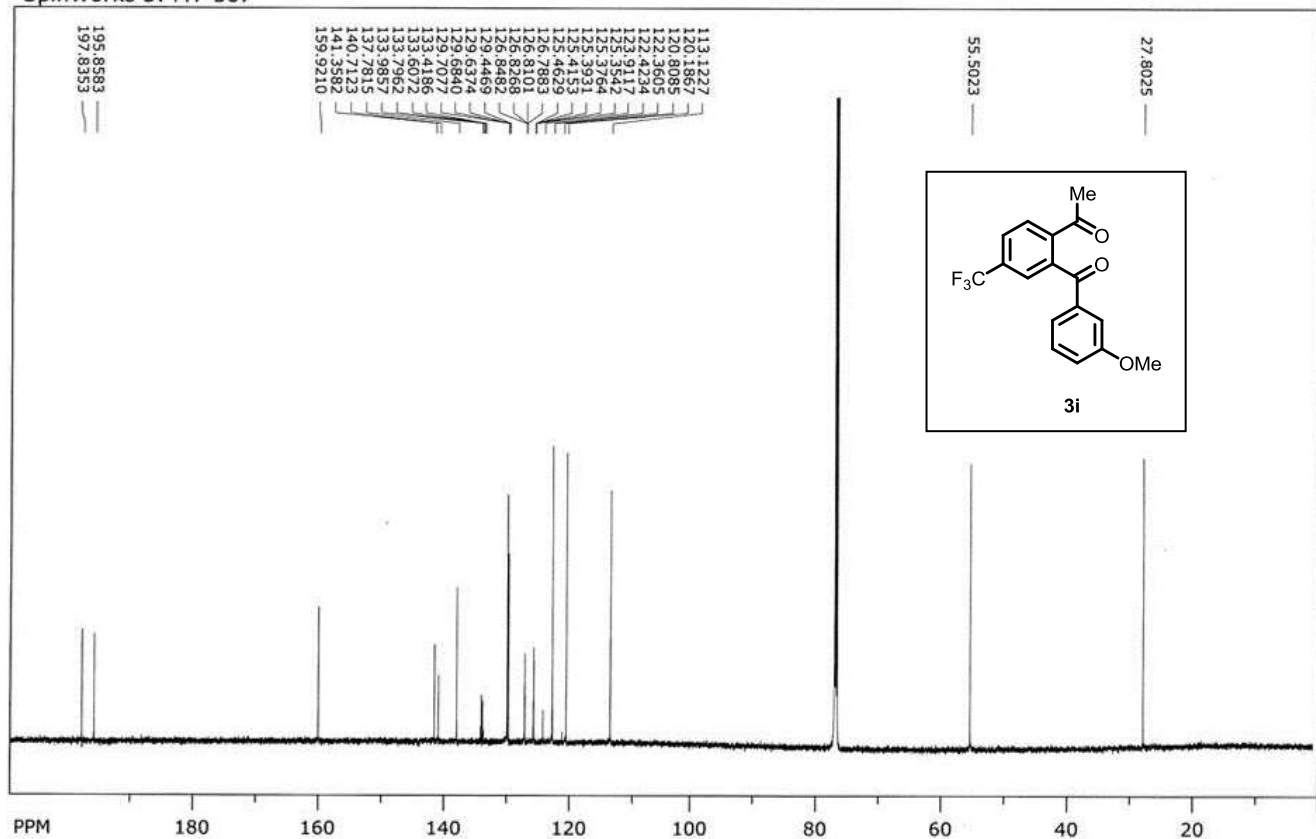

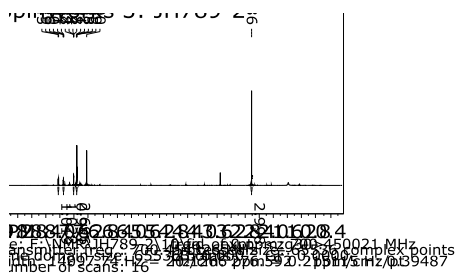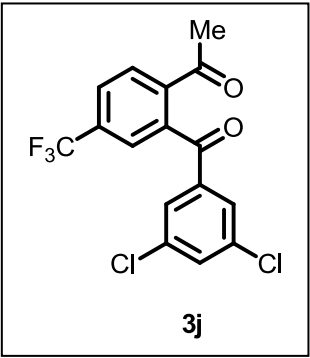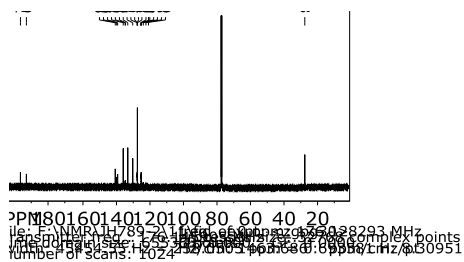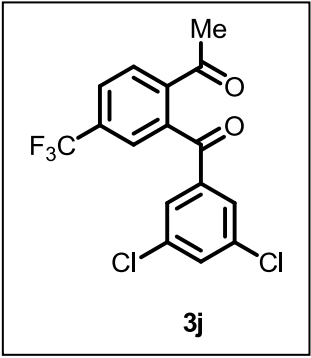

P88810686155484136282106084  
e: F:\NMR\1D\7841\0\data\smr\3f090\_450021.MHz  
integrated size: 6.55 bytes; 181256 complex points  
number of scans: 16 = 2x12x05 ppm=9.1-2.0ppm/smr/qc39487

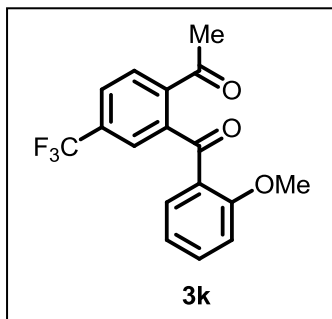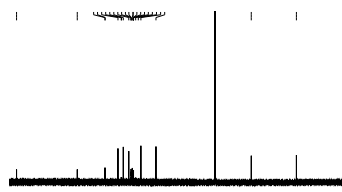

PM18016014012010080604020  
 s: F-1NMR (400 MHz, DMSO-d<sub>6</sub>)  $\delta$  12.293 (m, 1H, NH), 10.011 (s, 1H, NH), 8.094 (s, 1H, NH), 7.847 (d, 2H, ArH), 7.784 (d, 2H, ArH), 7.690 (d, 2H, ArH), 7.612 (d, 2H, ArH), 7.548 (d, 2H, ArH), 7.495 (d, 2H, ArH), 7.438 (d, 2H, ArH), 7.381 (d, 2H, ArH), 7.324 (d, 2H, ArH), 7.267 (d, 2H, ArH), 7.210 (d, 2H, ArH), 7.153 (d, 2H, ArH), 7.096 (d, 2H, ArH), 7.039 (d, 2H, ArH), 6.982 (d, 2H, ArH), 6.925 (d, 2H, ArH), 6.868 (d, 2H, ArH), 6.811 (d, 2H, ArH), 6.754 (d, 2H, ArH), 6.697 (d, 2H, ArH), 6.640 (d, 2H, ArH), 6.583 (d, 2H, ArH), 6.526 (d, 2H, ArH), 6.469 (d, 2H, ArH), 6.412 (d, 2H, ArH), 6.355 (d, 2H, ArH), 6.298 (d, 2H, ArH), 6.241 (d, 2H, ArH), 6.184 (d, 2H, ArH), 6.127 (d, 2H, ArH), 6.070 (d, 2H, ArH), 6.013 (d, 2H, ArH), 5.956 (d, 2H, ArH), 5.899 (d, 2H, ArH), 5.842 (d, 2H, ArH), 5.785 (d, 2H, ArH), 5.728 (d, 2H, ArH), 5.671 (d, 2H, ArH), 5.614 (d, 2H, ArH), 5.557 (d, 2H, ArH), 5.500 (d, 2H, ArH), 5.443 (d, 2H, ArH), 5.386 (d, 2H, ArH), 5.329 (d, 2H, ArH), 5.272 (d, 2H, ArH), 5.215 (d, 2H, ArH), 5.158 (d, 2H, ArH), 5.101 (d, 2H, ArH), 5.044 (d, 2H, ArH), 4.987 (d, 2H, ArH), 4.930 (d, 2H, ArH), 4.873 (d, 2H, ArH), 4.816 (d, 2H, ArH), 4.759 (d, 2H, ArH), 4.702 (d, 2H, ArH), 4.645 (d, 2H, ArH), 4.588 (d, 2H, ArH), 4.531 (d, 2H, ArH), 4.474 (d, 2H, ArH), 4.417 (d, 2H, ArH), 4.360 (d, 2H, ArH), 4.303 (d, 2H, ArH), 4.246 (d, 2H, ArH), 4.189 (d, 2H, ArH), 4.132 (d, 2H, ArH), 4.075 (d, 2H, ArH), 4.018 (d, 2H, ArH), 3.961 (d, 2H, ArH), 3.904 (d, 2H, ArH), 3.847 (d, 2H, ArH), 3.790 (d, 2H, ArH), 3.733 (d, 2H, ArH), 3.676 (d, 2H, ArH), 3.619 (d, 2H, ArH), 3.562 (d, 2H, ArH), 3.505 (d, 2H, ArH), 3.448 (d, 2H, ArH), 3.391 (d, 2H, ArH), 3.334 (d, 2H, ArH), 3.277 (d, 2H, ArH), 3.220 (d, 2H, ArH), 3.163 (d, 2H, ArH), 3.106 (d, 2H, ArH), 3.049 (d, 2H, ArH), 3.092 (d, 2H, ArH), 3.035 (d, 2H, ArH), 2.978 (d, 2H, ArH), 2.921 (d, 2H, ArH), 2.864 (d, 2H, ArH), 2.807 (d, 2H, ArH), 2.750 (d, 2H, ArH), 2.693 (d, 2H, ArH), 2.636 (d, 2H, ArH), 2.579 (d, 2H, ArH), 2.522 (d, 2H, ArH), 2.465 (d, 2H, ArH), 2.408 (d, 2H, ArH), 2.351 (d, 2H, ArH), 2.294 (d, 2H, ArH), 2.237 (d, 2H, ArH), 2.180 (d, 2H, ArH), 2.123 (d, 2H, ArH), 2.066 (d, 2H, ArH), 2.009 (d, 2H, ArH), 1.952 (d, 2H, ArH), 1.895 (d, 2H, ArH), 1.838 (d, 2H, ArH), 1.781 (d, 2H, ArH), 1.724 (d, 2H, ArH), 1.667 (d, 2H, ArH), 1.610 (d, 2H, ArH), 1.553 (d, 2H, ArH), 1.496 (d, 2H, ArH), 1.439 (d, 2H, ArH), 1.382 (d, 2H, ArH), 1.325 (d, 2H, ArH), 1.268 (d, 2H, ArH), 1.211 (d, 2H, ArH), 1.154 (d, 2H, ArH), 1.097 (d, 2H, ArH), 1.040 (d, 2H, ArH), 1.083 (d, 2H, ArH), 1.026 (d, 2H, ArH), 969.7 (d, 2H, ArH), 964.0 (d, 2H, ArH), 958.3 (d, 2H, ArH), 952.6 (d, 2H, ArH), 946.9 (d, 2H, ArH), 941.2 (d, 2H, ArH), 935.5 (d, 2H, ArH), 929.8 (d, 2H, ArH), 924.1 (d, 2H, ArH), 918.4 (d, 2H, ArH), 912.7 (d, 2H, ArH), 907.0 (d, 2H, ArH), 901.3 (d, 2H, ArH), 895.6 (d, 2H, ArH), 889.9 (d, 2H, ArH), 884.2 (d, 2H, ArH), 878.5 (d, 2H, ArH), 872.8 (d, 2H, ArH), 867.1 (d, 2H, ArH), 861.4 (d, 2H, ArH), 855.7 (d, 2H, ArH), 850.0 (d, 2H, ArH), 844.3 (d, 2H, ArH), 838.6 (d, 2H, ArH), 832.9 (d, 2H, ArH), 827.2 (d, 2H, ArH), 821.5 (d, 2H, ArH), 815.8 (d, 2H, ArH), 810.1 (d, 2H, ArH), 804.4 (d, 2H, ArH), 798.7 (d, 2H, ArH), 793.0 (d, 2H, ArH), 787.3 (d, 2H, ArH), 781.6 (d, 2H, ArH), 775.9 (d, 2H, ArH), 770.2 (d, 2H, ArH), 764.5 (d, 2H, ArH), 758.8 (d, 2H, ArH), 753.1 (d, 2H, ArH), 747.4 (d, 2H, ArH), 741.7 (d, 2H, ArH), 736.0 (d, 2H, ArH), 730.3 (d, 2H, ArH), 724.6 (d, 2H, ArH), 718.9 (d, 2H, ArH), 713.2 (d, 2H, ArH), 707.5 (d, 2H, ArH), 701.8 (d, 2H, ArH), 696.1 (d, 2H, ArH), 690.4 (d, 2H, ArH), 684.7 (d, 2H, ArH), 679.0 (d, 2H, ArH), 673.3 (d, 2H, ArH), 667.6 (d, 2H, ArH), 661.9 (d, 2H, ArH), 656.2 (d, 2H, ArH), 650.5 (d, 2H, ArH), 644.8 (d, 2H, ArH), 639.1 (d, 2H, ArH), 633.4 (d, 2H, ArH), 627.7 (d, 2H, ArH), 622.0 (d, 2H, ArH), 616.3 (d, 2H, ArH), 610.6 (d, 2H, ArH), 604.9 (d, 2H, ArH), 599.2 (d, 2H, ArH), 593.5 (d, 2H, ArH), 587.8 (d, 2H, ArH), 582.1 (d, 2H, ArH), 576.4 (d, 2H, ArH), 570.7 (d, 2H, ArH), 565.0 (d, 2H, ArH), 559.3 (d, 2H, ArH), 553.6 (d, 2H, ArH), 547.9 (d, 2H, ArH), 542.2 (d, 2H, ArH), 536.5 (d, 2H, ArH), 530.8 (d, 2H, ArH), 525.1 (d, 2H, ArH), 519.4 (d, 2H, ArH), 513.7 (d, 2H, ArH), 508.0 (d, 2H, ArH), 502.3 (d, 2H, ArH), 496.6 (d, 2H, ArH), 490.9 (d, 2H, ArH), 485.2 (d, 2H, ArH), 479.5 (d, 2H, ArH), 473.8 (d, 2H, ArH), 468.1 (d, 2H, ArH), 462.4 (d, 2H, ArH), 456.7 (d, 2H, ArH), 451.0 (d, 2H, ArH), 445.3 (d, 2H, ArH), 439.6 (d, 2H, ArH), 433.9 (d, 2H, ArH), 428.2 (d, 2H, ArH), 422.5 (d, 2H, ArH), 416.8 (d, 2H, ArH), 411.1 (d, 2H, ArH), 405.4 (d, 2H, ArH), 399.7 (d, 2H, ArH), 394.0 (d, 2H, ArH), 388.3 (d, 2H, ArH), 382.6 (d, 2H, ArH), 376.9 (d, 2H, ArH), 371.2 (d, 2H, ArH), 365.5 (d, 2H, ArH), 359.8 (d, 2H, ArH), 354.1 (d, 2H, ArH), 348.4 (d, 2H, ArH), 342.7 (d, 2H, ArH), 337.0 (d, 2H, ArH), 331.3 (d, 2H, ArH), 325.6 (d, 2H, ArH), 319.9 (d, 2H, ArH), 314.2 (d, 2H, ArH), 308.5 (d, 2H, ArH), 302.8 (d, 2H, ArH), 297.1 (d, 2H, ArH), 291.4 (d, 2H, ArH), 285.7 (d, 2H, ArH), 280.0 (d, 2H, ArH), 274.3 (d, 2H, ArH), 268.6 (d, 2H, ArH), 262.9 (d, 2H, ArH), 257.2 (d, 2H, ArH), 251

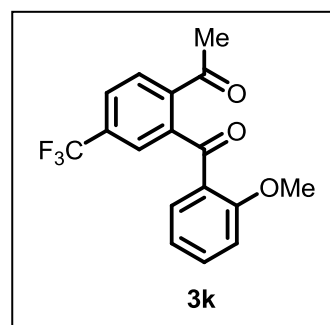

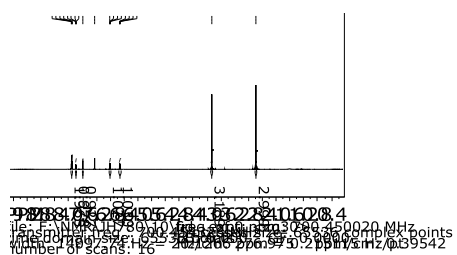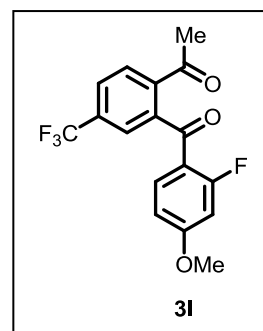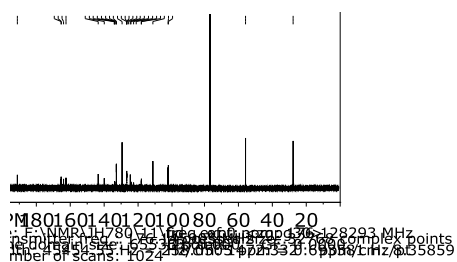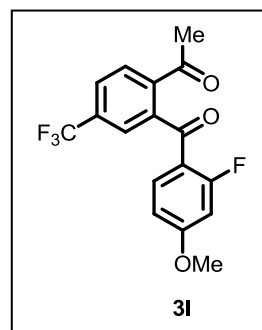

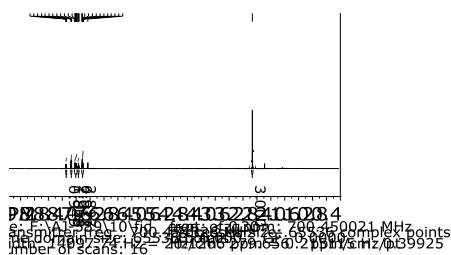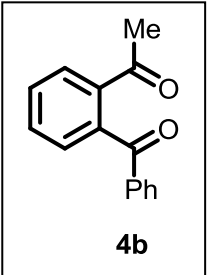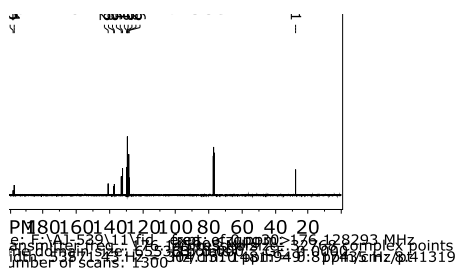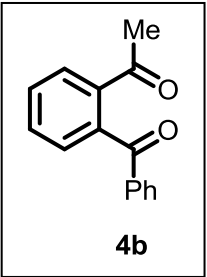

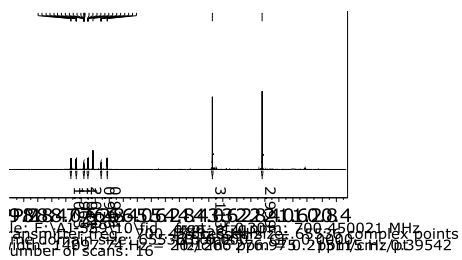

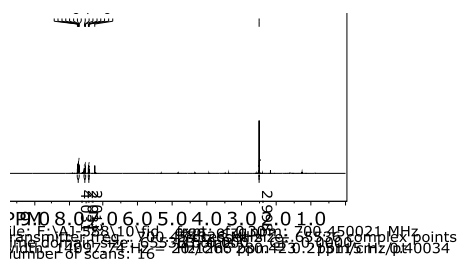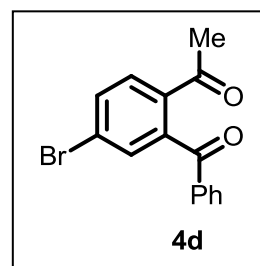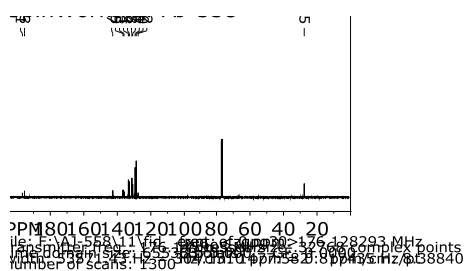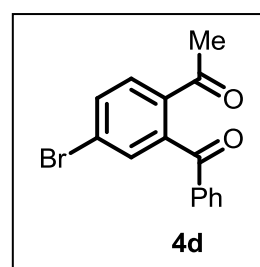



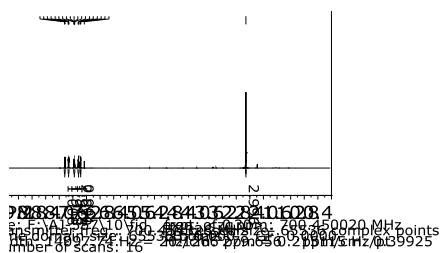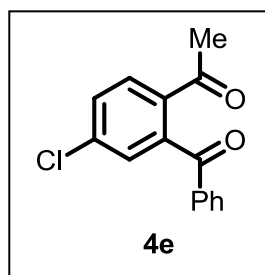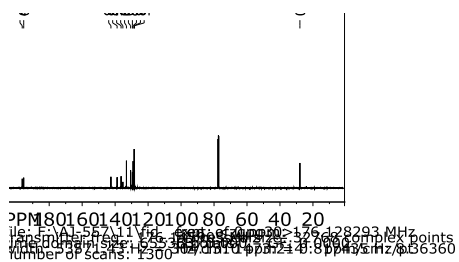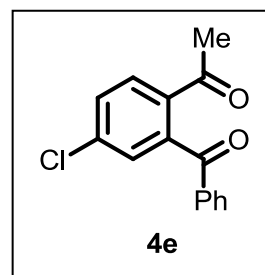

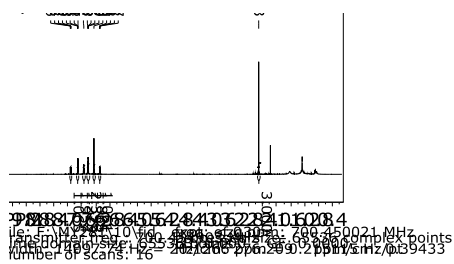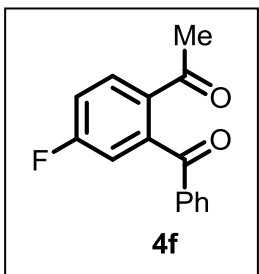

SpinWorks 3: MY281-13C

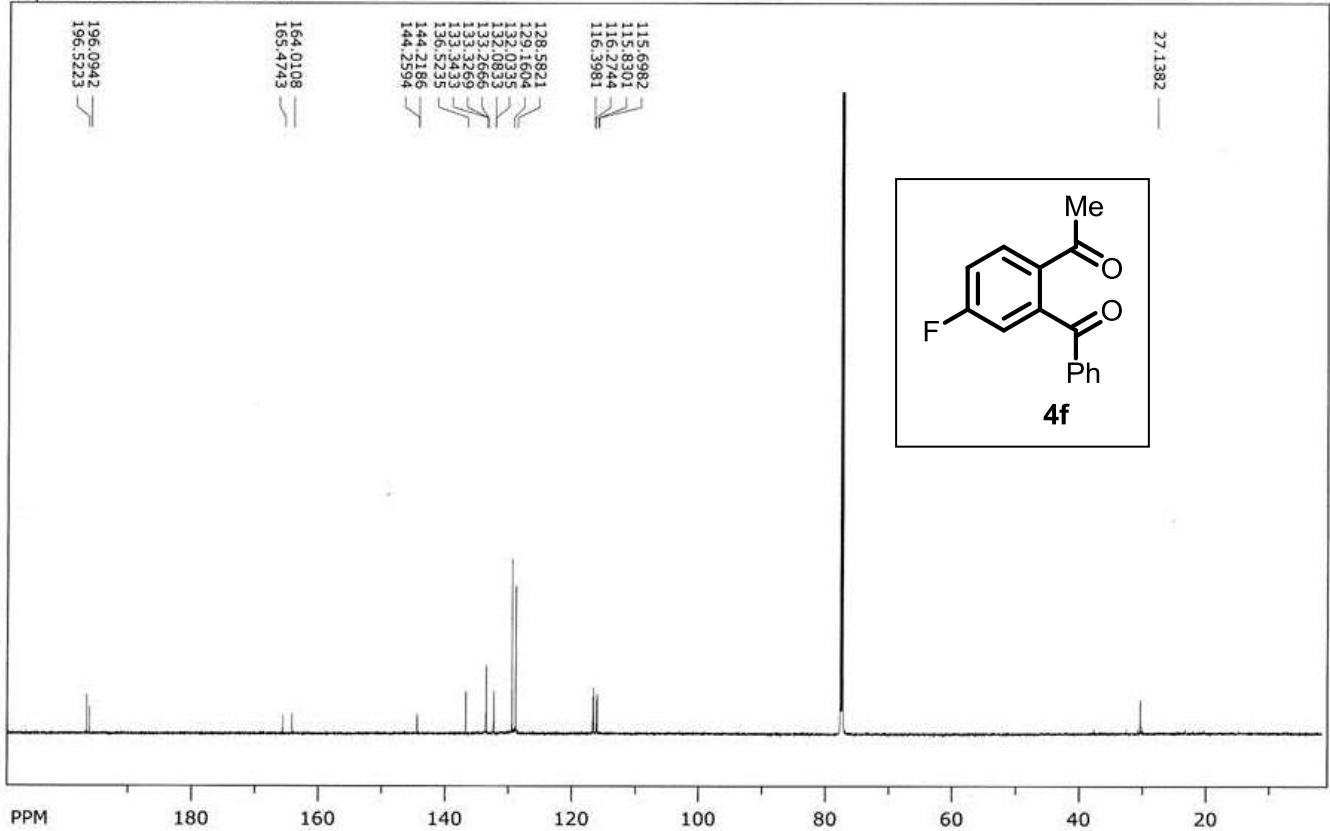

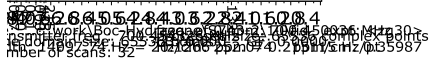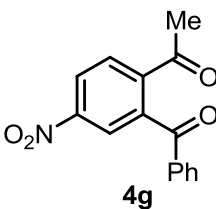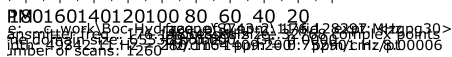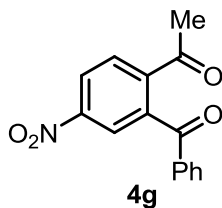

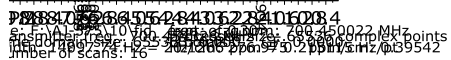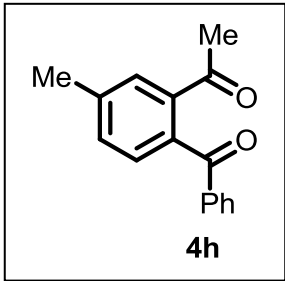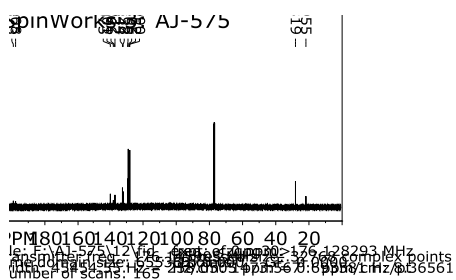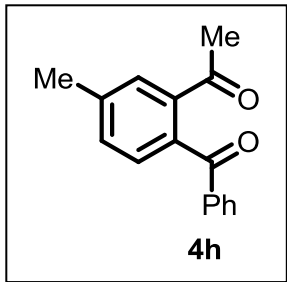

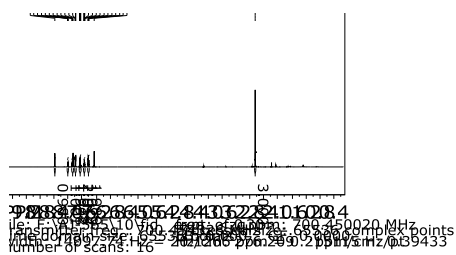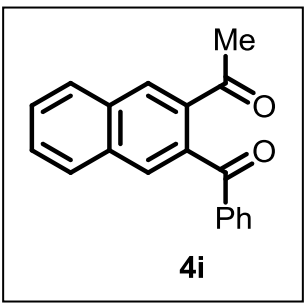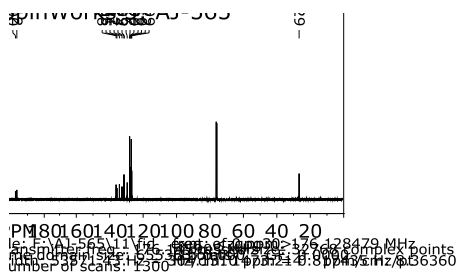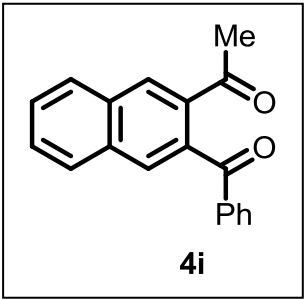

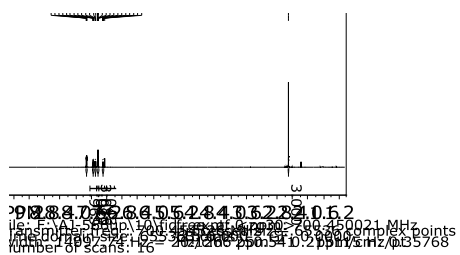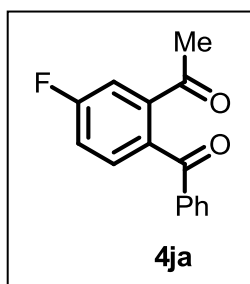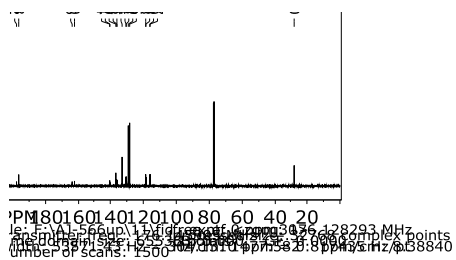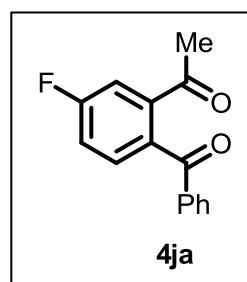

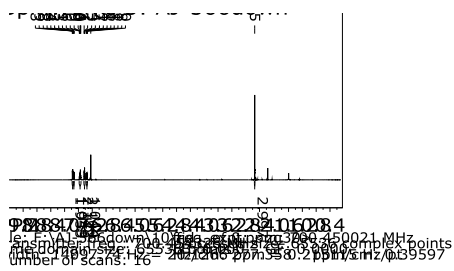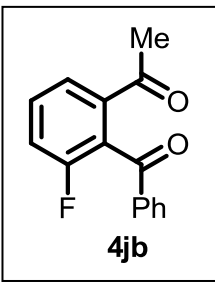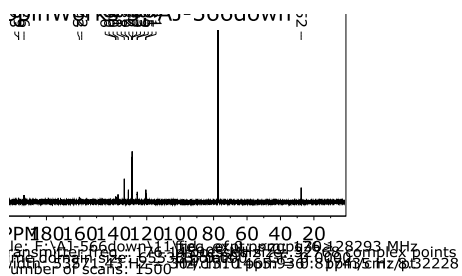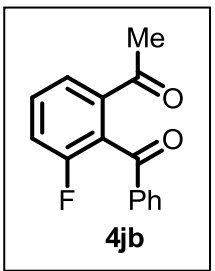

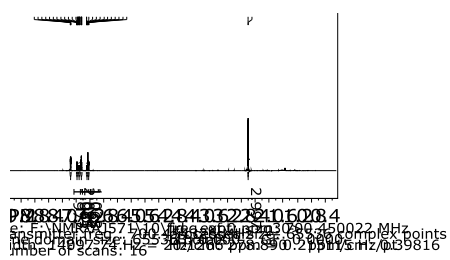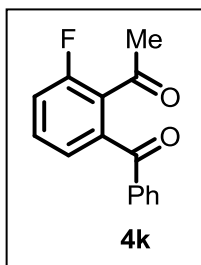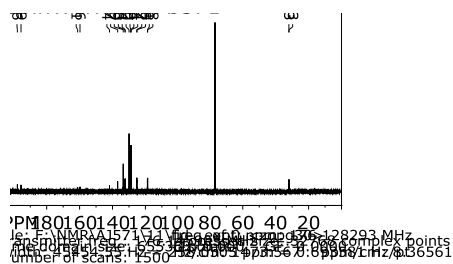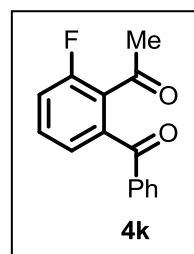



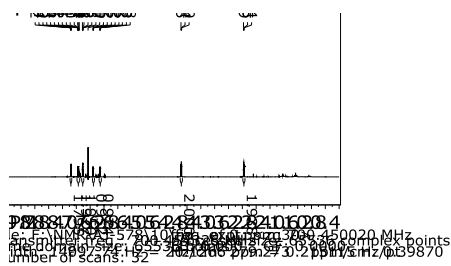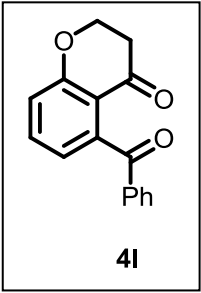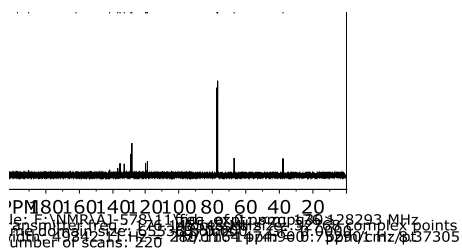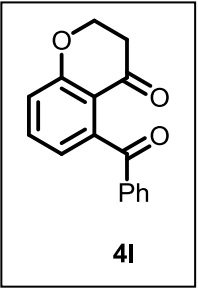

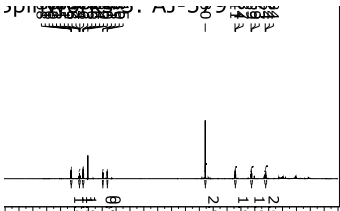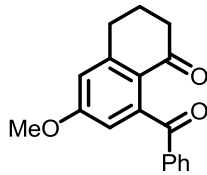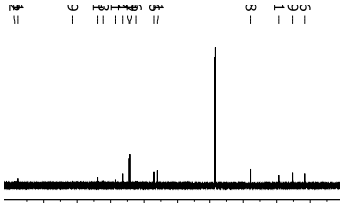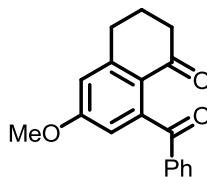

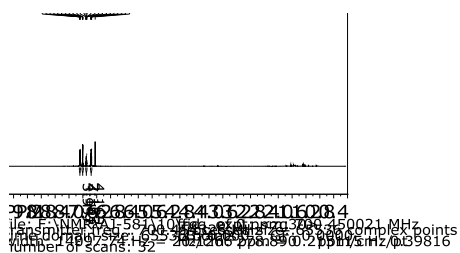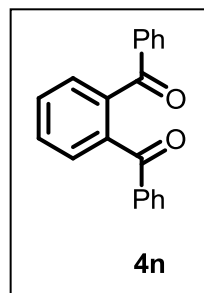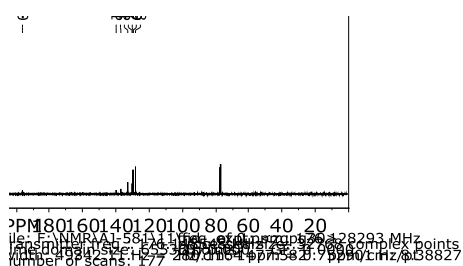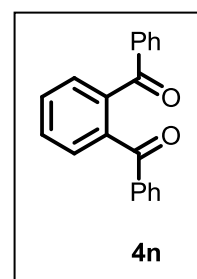

Supplement: c3ob41644e.pdf [file c3ob41644e.pdf]
